# Supplementary material
Source: PubMed Central journal article supplement (PMC3431687)

Figure S1

2/24/12

Mascot Search Results: Peptide View

**Mascot Search Results**

**Peptide View**

MS/MS Fragmentation of **VSTPVPGVVAPGSR**

Found in **AT2G35530.1**, Symbols: | bZIP transcription factor family protein | chr2:14923280-14926025 REVERSE

Match to Query 1: 1321.732724 from(661.873638,2+)

Data file Jihad Sample 661.8c.dta

Click mouse within plot area to zoom in by factor of two about that point

Or,  100 to 1300 Da

Label all possible matches  Label matches used for scoring

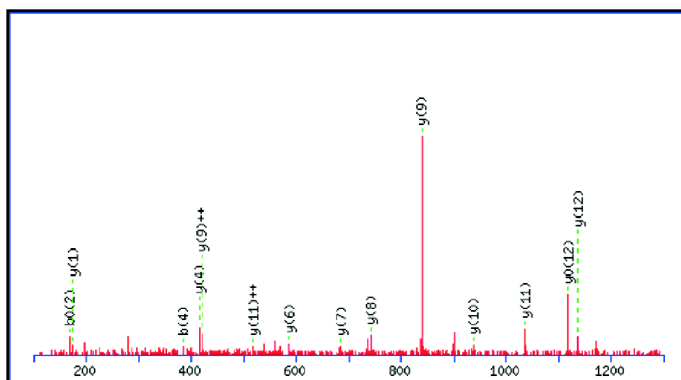

Monoisotopic mass of neutral peptide  $M_r(\text{calc})$ : 1321.7354

Ions Score: 39 Expect: 0.0032

Matches : 14/126 fragment ions using 39 most intense peaks [\(help\)](#)

| #  | b         | b <sup>++</sup> | b <sup>0</sup> | b <sup>0++</sup> | Seq. | y         | y <sup>++</sup> | y <sup>*</sup> | y <sup>*++</sup> | y <sup>0</sup> | y <sup>0++</sup> | #  |
|----|-----------|-----------------|----------------|------------------|------|-----------|-----------------|----------------|------------------|----------------|------------------|----|
| 1  | 100.0757  | 50.5415         |                |                  | V    |           |                 |                |                  |                |                  | 14 |
| 2  | 187.1077  | 94.0575         | 169.0972       | 85.0522          | S    | 1223.6743 | 612.3408        | 1206.6477      | 603.8275         | 1205.6637      | 603.3355         | 13 |
| 3  | 288.1554  | 144.5813        | 270.1448       | 135.5761         | T    | 1136.6422 | 568.8248        | 1119.6157      | 560.3115         | 1118.6317      | 559.8195         | 12 |
| 4  | 385.2082  | 193.1077        | 367.1976       | 184.1024         | P    | 1035.5946 | 518.3009        | 1018.5680      | 509.7876         | 1017.5840      | 509.2956         | 11 |
| 5  | 484.2766  | 242.6419        | 466.2660       | 233.6366         | V    | 938.5418  | 469.7745        | 921.5152       | 461.2613         | 920.5312       | 460.7693         | 10 |
| 6  | 581.3293  | 291.1683        | 563.3188       | 282.1630         | P    | 839.4734  | 420.2403        | 822.4468       | 411.7271         | 821.4628       | 411.2350         | 9  |
| 7  | 638.3508  | 319.6790        | 620.3402       | 310.6738         | G    | 742.4206  | 371.7139        | 725.3941       | 363.2007         | 724.4100       | 362.7087         | 8  |
| 8  | 737.4192  | 369.2132        | 719.4087       | 360.2080         | V    | 685.3991  | 343.2032        | 668.3726       | 334.6899         | 667.3886       | 334.1979         | 7  |
| 9  | 836.4876  | 418.7475        | 818.4771       | 409.7422         | V    | 586.3307  | 293.6690        | 569.3042       | 285.1557         | 568.3202       | 284.6637         | 6  |
| 10 | 907.5247  | 454.2660        | 889.5142       | 445.2607         | A    | 487.2623  | 244.1348        | 470.2358       | 235.6215         | 469.2518       | 235.1295         | 5  |
| 11 | 1004.5775 | 502.7924        | 986.5669       | 493.7871         | P    | 416.2252  | 208.6162        | 399.1987       | 200.1030         | 398.2146       | 199.6110         | 4  |
| 12 | 1061.5990 | 531.3031        | 1043.5884      | 522.2978         | G    | 319.1724  | 160.0899        | 302.1459       | 151.5766         | 301.1619       | 151.0846         | 3  |
| 13 | 1148.6310 | 574.8191        | 1130.6204      | 565.8139         | S    | 262.1510  | 131.5791        | 245.1244       | 123.0659         | 244.1404       | 122.5738         | 2  |
| 14 |           |                 |                |                  | R    | 175.1190  | 88.0631         | 158.0924       | 79.5498          |                |                  | 1  |

Figure S2

Redox regulation of bZIP transcription factors

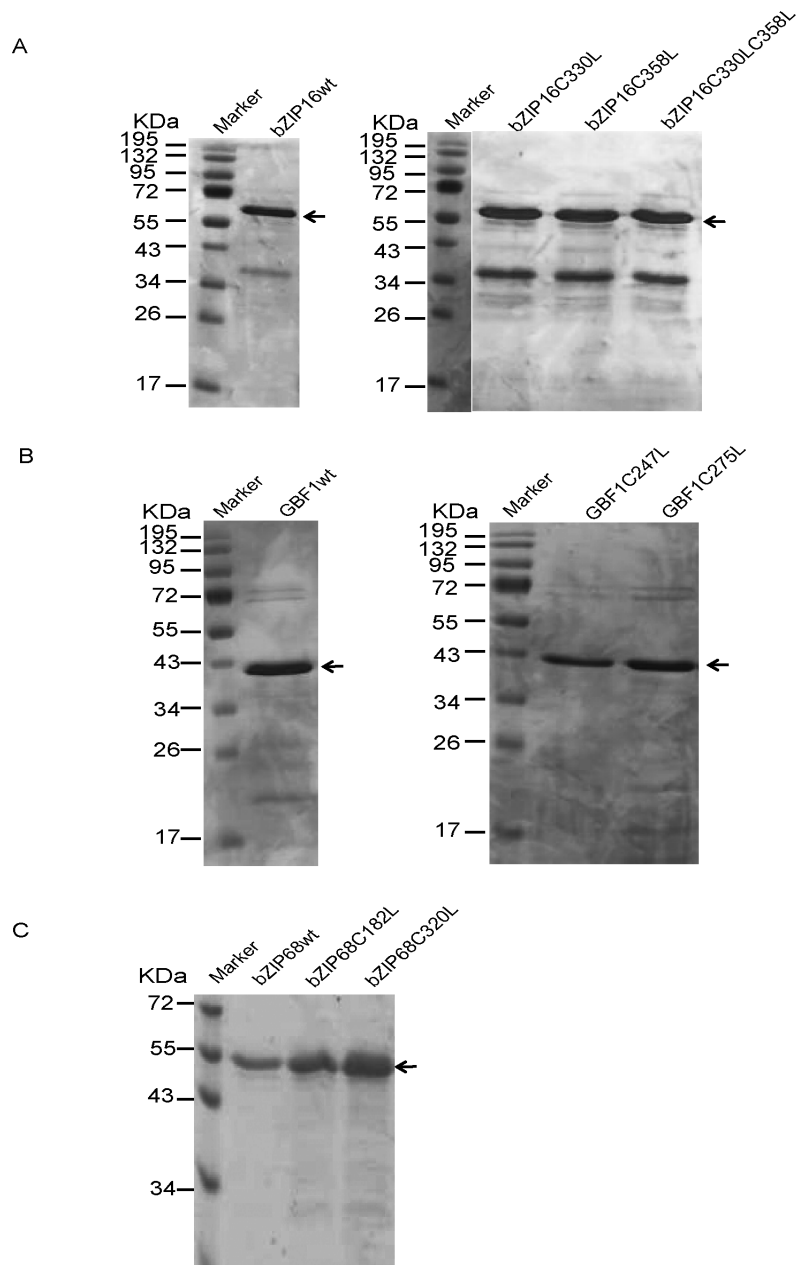

Figure S3

*Redox regulation of bZIP transcription factors*

|            |   |   |        |
|------------|---|---|--------|
| Competitor | - | - | + 100x |
| bZIP16     | - | + | +      |
| Gboxcis    | + | + | +      |

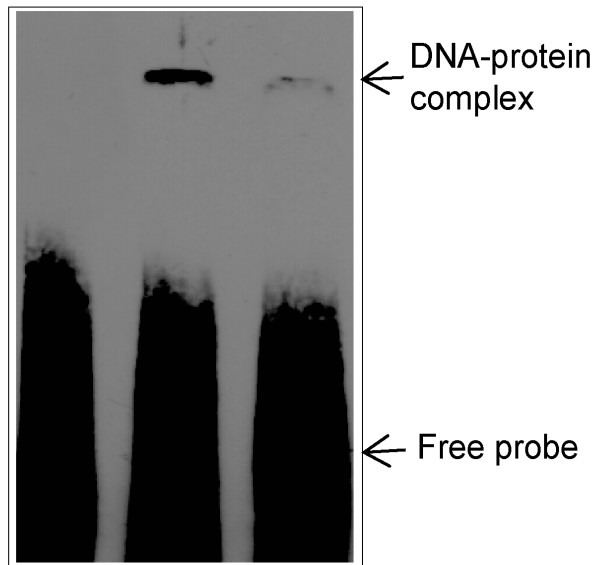

Figure S4

*Redox regulation of bZIP transcription factors*

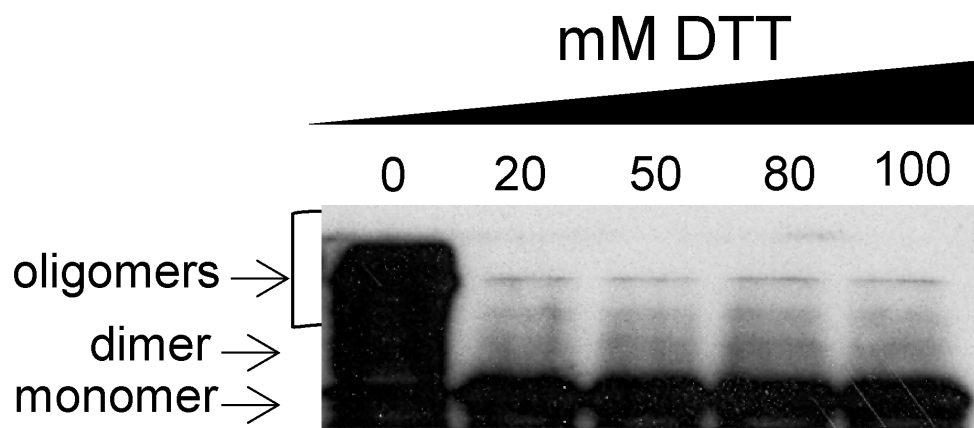

Supplement: supp_M112.361394_jbc.M112.361394-1.pdf [file supp_M112.361394_jbc.M112.361394-1.pdf]
