# Supplementary material
Source: PubMed Central journal article supplement (PMC3431687)
Supplement: supp_M112.361394_jbc.M112.361394-2.pdf [file supp_M112.361394_jbc.M112.361394-2.pdf]

### **Supplemental Figures**

The following files are available as supporting information for this manuscript:

**Figure S1.** Mascot Score Result and ion spectra for the AtbZIP16 identification.

**Figure S2.** Expression and purity of HIS-tagged recombinant proteins assessed by Coomassie staining.

**Figure S3.** Competition assay was performed with EMSA by adding unlabeled Gbox probe at 100 times in excess.

**Figure S4.** Increasing concentrations of DTT results in complete conversion to monomers.
